# Supplementary material for: Whole-Genome Analysis of Three Yeast Strains Used for Production of Sherry-Like Wines Revealed Genetic Traits Specific to Flor Yeasts
Source: Front Microbiol. 2018 May 15;9:965. doi: 10.3389/fmicb.2018.00965 (PMC5962777; doi:10.3389/fmicb.2018.00965)
Supplement: Supplementary file 9 [file Table_9.XLS]

## Sheet: Description
		This file contains the list of FYSM considered to be under positive selection and their superposition identified in two studies
		Sheet "Comparison" contains information of intersection of two gene sets . A- All 670 protein-coding genes with flor east specific SNP&InDel, considered to be under positive selection according to our study. B – 312 protein-coding genes likely to be under positive selection in flor strains as identified by Coi AL, Bigey F, Mallet S, Marsit S, Zara G, Gladieux P, et al. Genomic signatures of adapt…
		Sheet "names" contains names and descriptions of genes with FYSM present at intersection of sets "A" and "B". Outlined in blue are genes identified as important for ethanol tolerance by Yoshikawa K, Tanaka T, Furusawa C, Nagahisa K, Hirasawa T, Shimizu H.Comprehensive phenotypic analysis for identification of genes affecting growth under ethanol stress in Saccharomyces cerevisiae. FEMS Yeast Res.…
		Sheet "Cell component" contains information on GO enrichment analysis

## Sheet: Comparison
	A B	89	YPL194W YPL180W YIL135C YLR342W YGR271W YHR164C YGL228W YJL051W YCL024W YOR316C YIL121W YGL008C YML035C YOL123W YIL046W YHR097C YPL175W YPR108W YNL144C YIL022W YBR230W-A YOR371C YGR200C YIL026C YGR270W YKL219W YBR068C YKL163W YDR064W YPR108W-A YOR044W YKL174C YGR169C YGL257C YNR051C YIL023C YOR255W YPR077C YGL258W-A YNR044W YPL240C YLL057C YKL162C YGL007C-A YLR054C YOR316C-A YMR090W YKL218C YJL04…
	B	223	YOL121C YOR192C YDR342C YLL052C YOL098C YIL148W YER056C YER114C YKL193C YOR178C YLR328W YKL173W YPL183C YPR078C YMR317W YDL203C YPL199C YIL119C YOR180C YNR065C YPL229W YLR052W YPL104W YAR028W YJL046W YGL259W YNL209W YAL064W YMR019W YKL135C YBL047C YJL047C YOR228C YLL050C YMR002W YGR133W YDR357C YDL003W YOL063C YER146W YIR042C YOL111C YOR256C YKR054C YOR183W YPL273W YDR396W YPL201C YOR151C YMR288W…

## Sheet: Names
	A B	89	YPL194W YPL180W YIL135C YLR342W YGR271W YHR164C YGL228W YJL051W YCL024W YOR316C YIL121W YGL008C YML035C YOL123W YIL046W YHR097C YPL175W YPR108W YNL144C YIL022W YBR230W-A YOR371C YGR200C YIL026C YGR270W YKL219W YBR068C YKL163W YDR064W YPR108W-A YOR044W YKL174C YGR169C YGL257C YNR051C YIL023C YOR255W YPR077C YGL258W-A YNR044W YPL240C YLL057C YKL162C YGL007C-A YLR054C YOR316C-A YMR090W YKL218C YJL04…
	B	223	YOL121C YOR192C YDR342C YLL052C YOL098C YIL148W YER056C YER114C YKL193C YOR178C YLR328W YKL173W YPL183C YPR078C YMR317W YDL203C YPL199C YIL119C YOR180C YNR065C YPL229W YLR052W YPL104W YAR028W YJL046W YGL259W YNL209W YAL064W YMR019W YKL135C YBL047C YJL047C YOR228C YLL050C YMR002W YGR133W YDR357C YDL003W YOL063C YER146W YIR042C YOL111C YOR256C YKR054C YOR183W YPL273W YDR396W YPL201C YOR151C YMR288W…
Gene > Systematic Name	Gene > Standard Name	Gene > Name	Gene > Brief Description
YBL054W	TOD6	Twin Of Dot6p	PAC motif binding protein involved in rRNA and ribosome biogenesis
YBR068C	BAP2	Branched-chain Amino acid Permease	High-affinity leucine permease
YBR140C	IRA1	Inhibitory Regulator of the RAS-cAMP pathway	GTPase-activating protein
YBR230W-A		COQ interacting protein	Putative protein of unknown function
YCL024W	KCC4		Protein kinase of the bud neck involved in the septin checkpoint
YDR001C	NTH1	Neutral TreHalase	Neutral trehalase, degrades trehalose
YDR011W	SNQ2	Sensitivity to 4-NitroQuinoline-N-oxide	Plasma membrane ATP-binding cassette (ABC) transporter
YDR064W	RPS13	Ribosomal Protein of the Small subunit	Protein component of the small (40S) ribosomal subunit
YDR274C			Putative protein of unknown function
YDR397C	NCB2	Negative Cofactor B	Subunit of a heterodimeric NC2 transcription regulator complex
YDR497C	ITR1	myo-Inositol TRansporter	Myo-inositol transporter
YDR501W	PLM2	PLasmid Maintenance	Putative transcription factor, contains Forkhead Associated domain
YER055C	HIS1	HIStidine	ATP phosphoribosyltransferase
YER145C	FTR1	Fe TRansporter	High affinity iron permease
YGL007C-A			Putative protein of unknown function
YGL007W	BRP1		Putative protein of unknown function
YGL008C	PMA1	Plasma Membrane ATPase	Plasma membrane P2-type H+-ATPase
YGL185C			Putative protein with sequence similar to hydroxyacid dehydrogenases
YGL192W	IME4	Inducer of MEiosis	mRNA N6-adenosine methyltransferase required for entry into meiosis
YGL228W	SHE10	Sensitivity to High Expression	Protein involved in outer spore wall assembly
YGL254W	FZF1	Five Zinc Fingers	Transcription factor involved in sulfite metabolism
YGL257C	MNT2	MaNnosylTransferase	Mannosyltransferase
YGL258W-A			Putative protein of unknown function
YGR169C	PUS6	PseudoUridine Synthase	tRNA:pseudouridine synthase
YGR198W	YPP1	alpha-sYnuclein Protective Protein	Cargo-transport protein involved in endocytosis
YGR200C	ELP2	ELongator Protein	Subunit of Elongator complex
YGR270W	YTA7	Yeast Tat-binding Analog	Protein that localizes to chromatin
YGR271W	SLH1	SKI2-Like Helicase	Putative RNA helicase related to Ski2p
YHR097C			Putative protein of unknown function
YHR112C			Protein of unknown function
YHR164C	DNA2	DNA synthesis defective	Tripartite DNA replication factor
YIL022W	TIM44	Translocase of the Inner Mitochondrial membrane	Essential component of the TIM23 complex
YIL023C	YKE4	Yeast ortholog of mouse KE4	Zinc transporter
YIL026C	IRR1	IRRegular cell behavior	Subunit of the cohesin complex
YIL046W	MET30	METhionine requiring	F-box protein containing five copies of the WD40 motif
YIL121W	QDR2	QuiniDine Resistance	Plasma membrane transporter of the major facilitator superfamily
YIL134W	FLX1	FLavin eXchange	Mitochondrial flavin adenine dinucleotide transporter
YIL135C	VHS2	Viable in a Hal3 Sit4 background	Regulator of septin dynamics
YJL042W	MHP1	MAP-Homologous Protein	Microtubule-associated protein involved in microtubule organization
YJL051W	IRC8	Increased Recombination Centers	Bud tip localized protein of unknown function
YJL078C	PRY3	Pathogen Related in Yeast	Cell wall-associated protein involved in export of acetylated sterols
YJR147W	HMS2	High-copy Mep Suppressor	Protein with similarity to heat shock transcription factors
YKL068W	NUP100	NUclear Pore	FG-nucleoporin component of central core of the nuclear pore complex
YKL136W			Dubious open reading frame
YKL161C	KDX1	Kinase Dead X-talker	Protein kinase
YKL162C			Putative protein of unknown function
YKL163W	PIR3	Protein containing Internal Repeats	O-glycosylated covalently-bound cell wall protein
YKL174C	TPO5	Transporter of POlyamines	Protein involved in excretion of putrescine and spermidine
YKL218C	SRY1	Serine Racemase of Yeast	3-hydroxyaspartate dehydratase
YKL219W	COS9	COnserved Sequence	Endosomal protein involved in turnover of plasma membrane proteins
YLL040C	VPS13	Vacuolar Protein Sorting	Protein involved in prospore membrane morphogenesis
YLL057C	JLP1	dnaJ-Like Protein	Fe(II)-dependent sulfonate/alpha-ketoglutarate dioxygenase
YLR044C	PDC1	Pyruvate DeCarboxylase	Major of three pyruvate decarboxylase isozymes
YLR054C	OSW2	Outer Spore Wall	Protein of unknown function reputedly involved in spore wall assembly
YLR342W	FKS1	FK506 Sensitivity	Catalytic subunit of 1,3-beta-D-glucan synthase
YLR436C	ECM30	ExtraCellular Mutant	Protein of unknown function
YML035C	AMD1	AMP Deaminase	AMP deaminase
YML057W	CMP2	CalModulin binding Protein	Calcineurin A
YMR020W	FMS1	Fenpropimorph-resistance Multicopy Suppressor	Polyamine oxidase
YMR038C	CCS1	Copper Chaperone for SOD1	Copper chaperone for superoxide dismutase Sod1p
YMR090W			Putative protein of unknown function
YMR318C	ADH6	Alcohol DeHydrogenase	NADPH-dependent medium chain alcohol dehydrogenase
YNL144C			Putative protein of unknown function
YNR044W	AGA1	a-AGglutinin	Anchorage subunit of a-agglutinin of a-cells
YNR051C	BRE5	BREfeldin A sensitivity	Ubiquitin protease cofactor
YOL048C	RRT8	Regulator of rDNA Transcription	Protein involved in spore wall assembly
YOL091W	SPO21	SPOrulation	Component of the meiotic outer plaque of the spindle pole body
YOL123W	HRP1	Heterogenous nuclear RibonucleoProtein	Subunit of cleavage factor I
YOR044W	IRC23	Increased Recombination Centers	Protein of unknown function
YOR072W-B			Putative protein of unknown function
YOR073W	SGO1	ShuGOshin (Japanese for "guardian spirit")	Component of the spindle checkpoint
YOR249C	APC5	Anaphase Promoting Complex	Subunit of the Anaphase-Promoting Complex/Cyclosome (APC/C)
YOR254C	SEC63	SECretory	Essential subunit of Sec63 complex
YOR255W	OSW1	Outer Spore Wall	Protein involved in sporulation
YOR316C	COT1	CObalt Toxicity	Vacuolar transporter that mediates zinc transport into the vacuole
YOR316C-A			Putative protein of unknown function
YOR371C	GPB1		Multistep regulator of cAMP-PKA signaling
YPL054W	LEE1		Zinc-finger protein of unknown function
YPL163C	SVS1	Suppressor of Vanadate Sensitivity	Cell wall and vacuolar protein
YPL166W	ATG29	AuTophaGy related	Autophagy-specific protein
YPL167C	REV3	REVersionless	Catalytic subunit of DNA polymerase zeta
YPL175W	SPT14	SuPpressor of Ty	UDP-glycosyltransferase subunit of the GPI-GnT complex
YPL180W	TCO89	Tor Complex One	Subunit of TORC1 (Tor1p or Tor2p-Kog1p-Lst8p-Tco89p)
YPL194W	DDC1	DNA Damage Checkpoint	DNA damage checkpoint protein
YPL240C	HSP82	Heat Shock Protein	Hsp90 chaperone
YPR013C	CMR3	Changed Mutation Rate	Putative zinc finger protein
YPR077C			Dubious open reading frame
YPR108W	RPN7	Regulatory Particle Non-ATPase	Essential non-ATPase regulatory subunit of the 26S proteasome
YPR108W-A			Putative protein of unknown function

## Sheet: Cell component
GO term	P-value	Matches	GO term
cell periphery	0.03927228816669157	YBR068C,YBR140C,YCL024W,YDR011W,YDR497C,YER145C,YGL008C,YGL257C,YGR198W,YGR200C,YHR097C,YIL121W,YJL051W,YJL078C,YKL163W,YKL174C,YLR342W,YNR044W,YOL048C,YOR255W,YOR371C,YPL163C,YPL180W	GO:0071944
